# Supplementary material for: MtNF-YA1, A Central Transcriptional Regulator of Symbiotic Nodule Development, Is Also a Determinant of Medicago truncatula Susceptibility toward a Root Pathogen
Source: PubMed Central journal article supplement (PMC5137509; doi:10.3389/fpls.2016.01837), 2016-12-05
Supplement: Image_1.pdf [file Image_1.pdf]

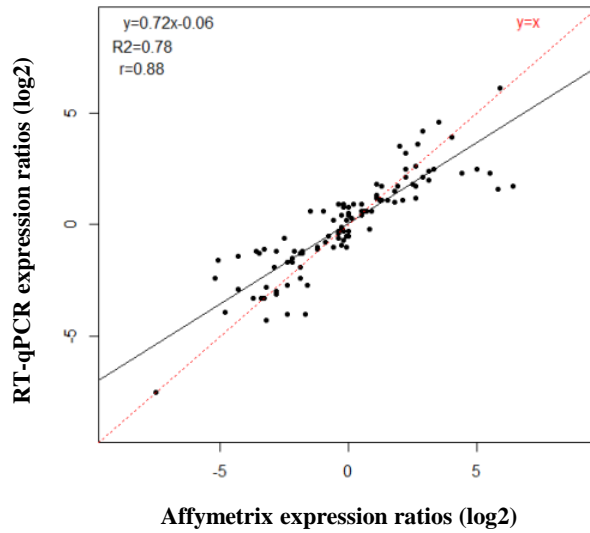

**Supplementary Figure 1:** Linear regression between gene expression ratios obtained for regulated genes identified with Affymetrix microarray data (according to the five ratios used for clustering) and those obtained by qPCR with the  $2^{-\Delta\Delta C_t}$  method.

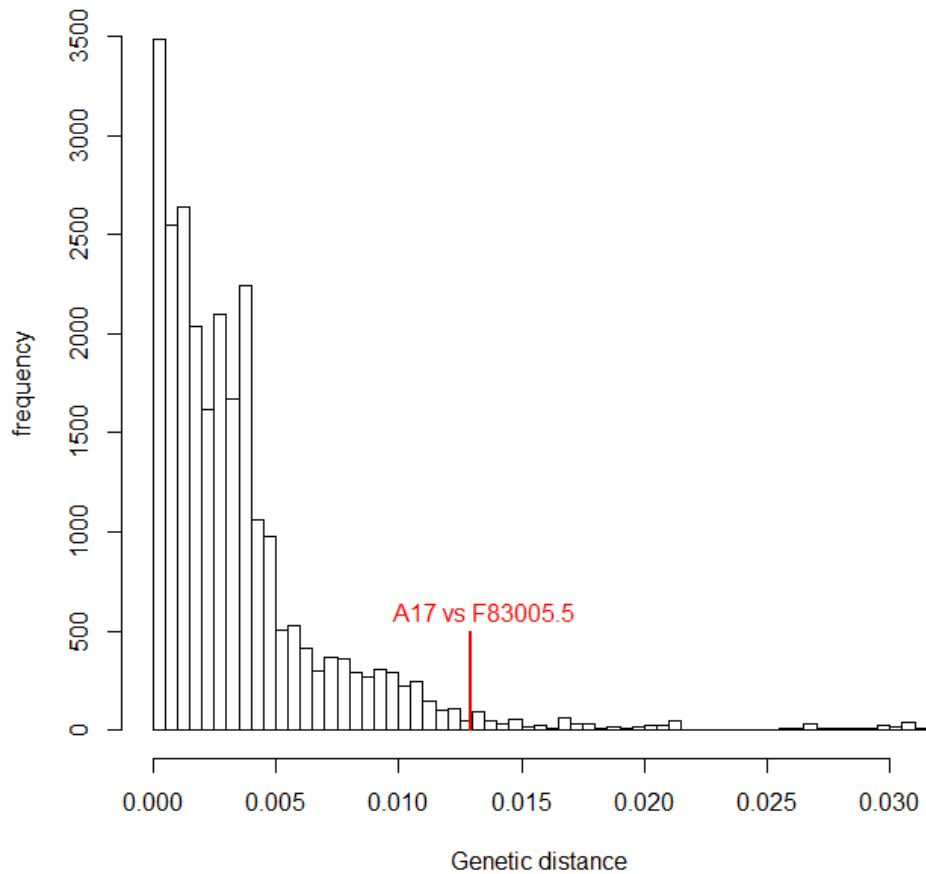

**Supplementary Figure 2:** Distribution of 25651 genetic distance values across 226 accessions of *M. truncatula*. Estimates were obtained using the Kimura 2-parameters evolutionary model. In red is indicated the genetic distance between A17 and F83005.5 (0.013), which is among the top 3% highest pairwise distance values calculated.

A

A17

*nf-ya1-1*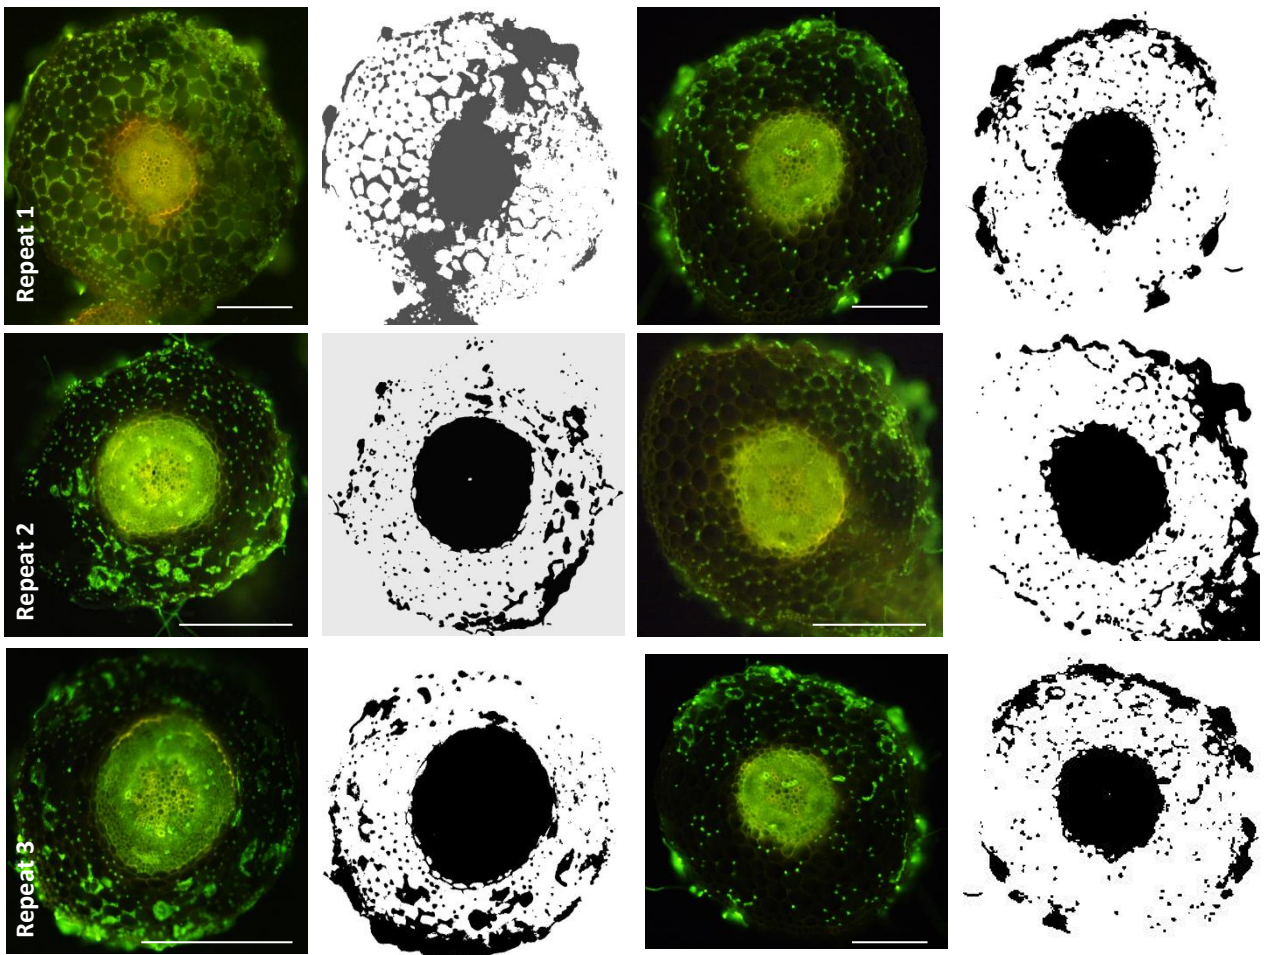

B

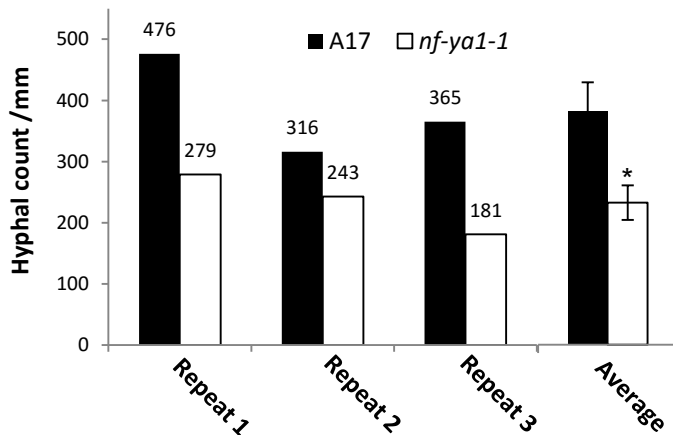

**Supplementary Figure 3:** Observation of *A. euteiches* hyphal density in root cross sections, 21 days post inoculation (Scale bar =100 $\mu$ m).

A – Observation of root cross sections in three inoculations repeats of the A17 and *nf-ya1-1*. Each picture (left panel of each genotype) was subjected to a particle analysis (right panel) to detect the number of hyphae in the root cross section

B– Summary of hyphal count detected in each picture a Mann–Whitney U test was applied to assess significance of *nf-ya1-1* lower colonisation(\*: pvalue < 0.05).
